# Supplementary material
Source: publisher figshare collection journal article supplement (https://acs.figshare.com/ndownloader/files/4142176)
Supplement: Supplementary file 1 [file 4142176]

# Supporting Information

## Controllable synthesis and acetylene hydrogenation performance of supported Pd nanowire and cuboctahedron catalysts

*Yu-Fei He, Jun-Ting Feng\*, Yi-Yun Du, and Dian-Qing Li\**

State Key Laboratory of Chemical Resource Engineering,

Beijing University of Chemical Technology, Beijing 100029, China.

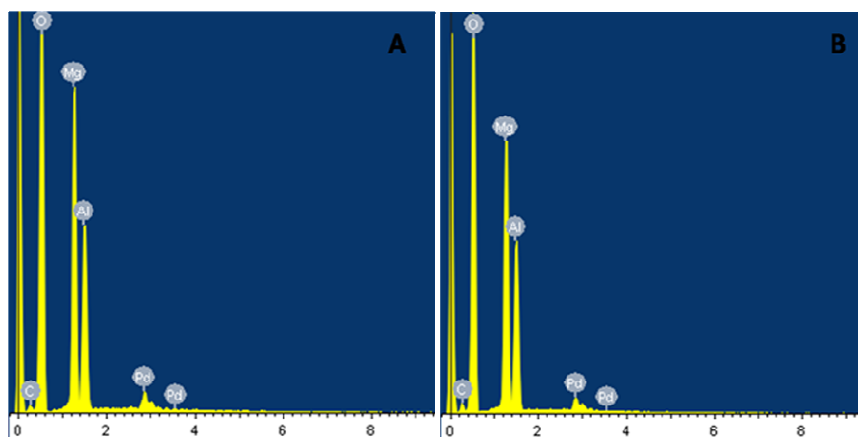

Figure S1 EDX spectra of SWPL catalyst (A) and CPL catalyst (B)
